# Supplementary material for: On the linkage between future Arctic sea ice retreat, Euro-Atlantic circulation regimes and temperature extremes over Europe
Source: Copernicus journal article supplement (doi:10.5194/egusphere-2022-953), 2022-09-29
Supplement: Supplementary file [file egusphere-2022-953-AC2-supplement.pdf]

## Supplementary material

**Table S1:** List of PAMIP models that were used for the analysis in Figs. S1–S3. Listed is also the available ensemble size for each experimental setup (in number of years)

| Institute                                                                                      | Model           | pdSST/pdSIC | futArcSIC | futBKSIC |
|------------------------------------------------------------------------------------------------|-----------------|-------------|-----------|----------|
| Max Planck Institute for Meteorology, Hamburg                                                  | ECHAM6          | 100         | 100       | 100      |
| National Center for Atmospheric Research<br>Canadian                                           | CESM2           | 200         | 200       | -        |
| Norwegian Meteorological Institute                                                             | NorESM2-LM      | 200         | 200       | -        |
| University of Tokyo/National Institute for Environmental Studies/Japan Agency for Marine-Earth | MIROC6          | 100         | 100       | 100      |
| Canadian Centre for Climate Modelling and Analysis                                             | CanESM5         | 300         | 300       | -        |
| US Department of Energy/University of California Irvine                                        | E3SMv1          | 185         | 190       | 100      |
| Met Office UK                                                                                  | HadGEM3-GC31-MM | 300         | 300       | 200      |
| National Center of Atmospheric Research/<br>University of California Irvine                    | CESM1-WACCM-SC  | 300         | 100       | 100      |
| Institute of Atmospheric Physics, Beijing                                                      | FGOALS-f3-L     | 100         | 100       | -        |
| Centre Européen de Recherche et de Formation Avancée en Calcul Scientifique<br>US              | CNRM-CM6-1      | 300         | 300       | -        |
| Institute Pierre Simon Laplace<br>University                                                   | IPSL-CM6A-LR    | 200         | 200       | 100      |

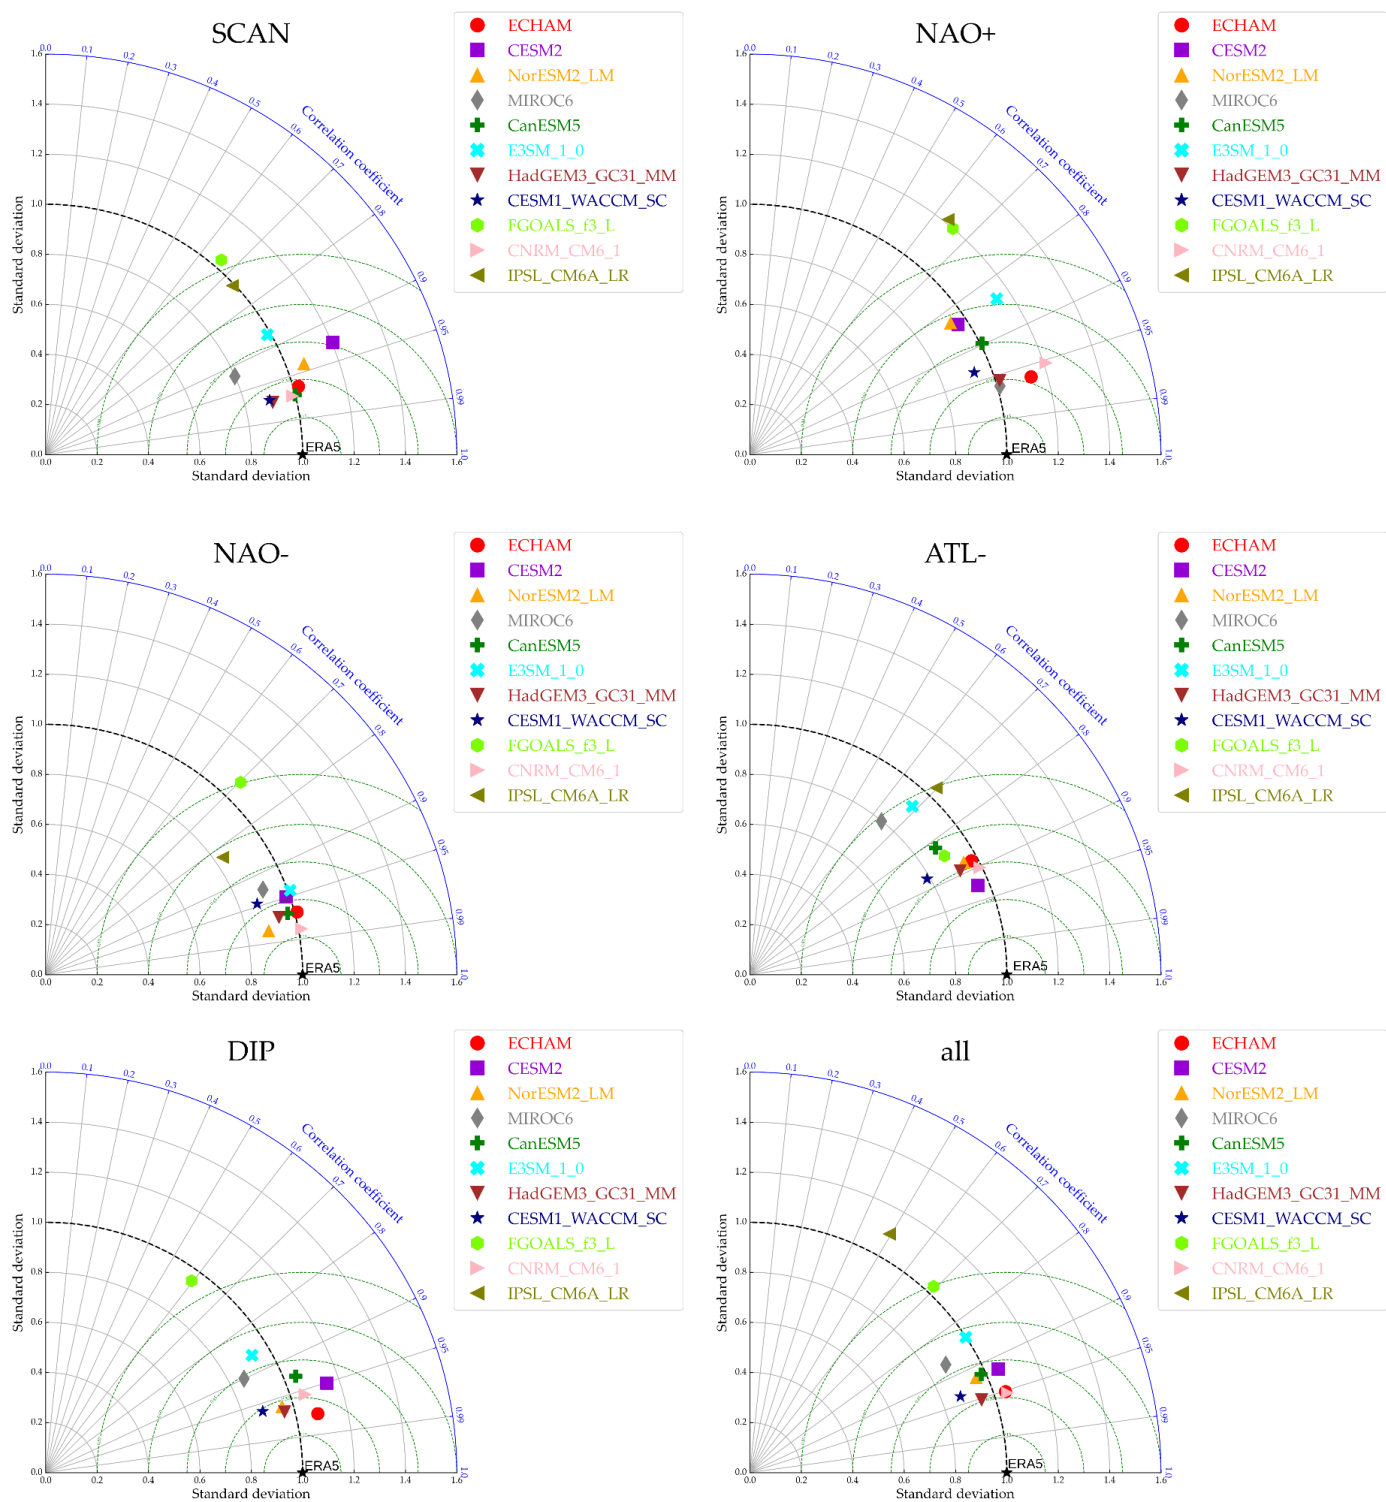

**Figure S1:** Taylor diagrams that summarize different statistics in order to compare computed model patterns from different PAMIP models with regime patterns obtained from ERA5 (see e.g. Fig. A2). Different symbols/colors indicate different models. Regimes were computed by merging the pdSST/pdSIC with the futArcSIC data set. Individual Taylor diagrams compare individual model regimes with the respective ERA5 regimes. The Taylor diagram in the lower right (“all”) compares the statistics averaged over all regimes.

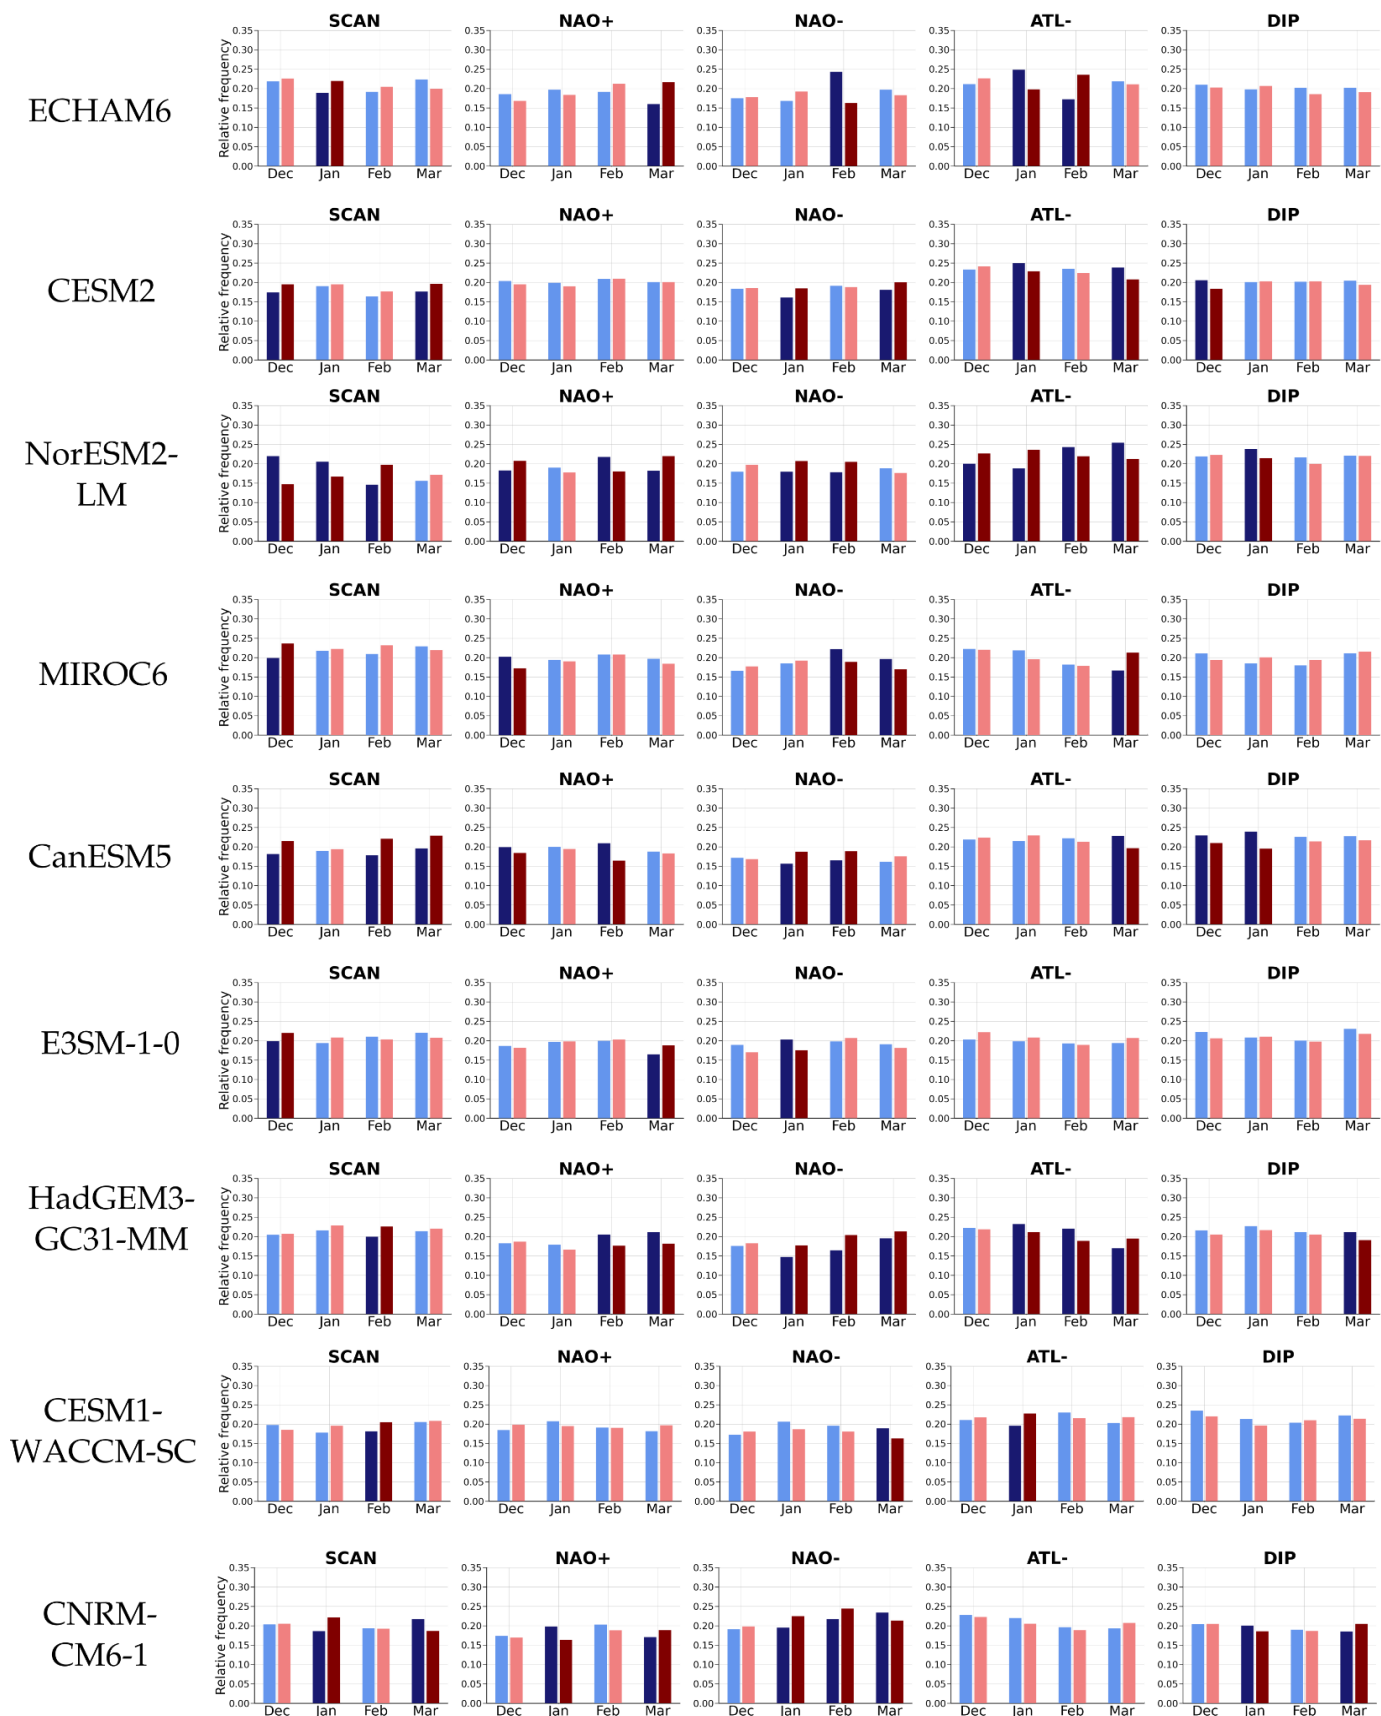

**Figure S2:** Relative regime occurrence frequencies for different winter months as in Figs. 2a–e, but for different PAMIP models (ERA5 not shown). Compared are the *pdSST/pdSIC* reference simulation (blueish bars) and the *futArcSIC* (redish bars). Only the nine models that according to Fig. S1 are able to realistically reproduce most of the ERA5 regime pattern structures were considered here. Dark-colored bars indicate significant differences.

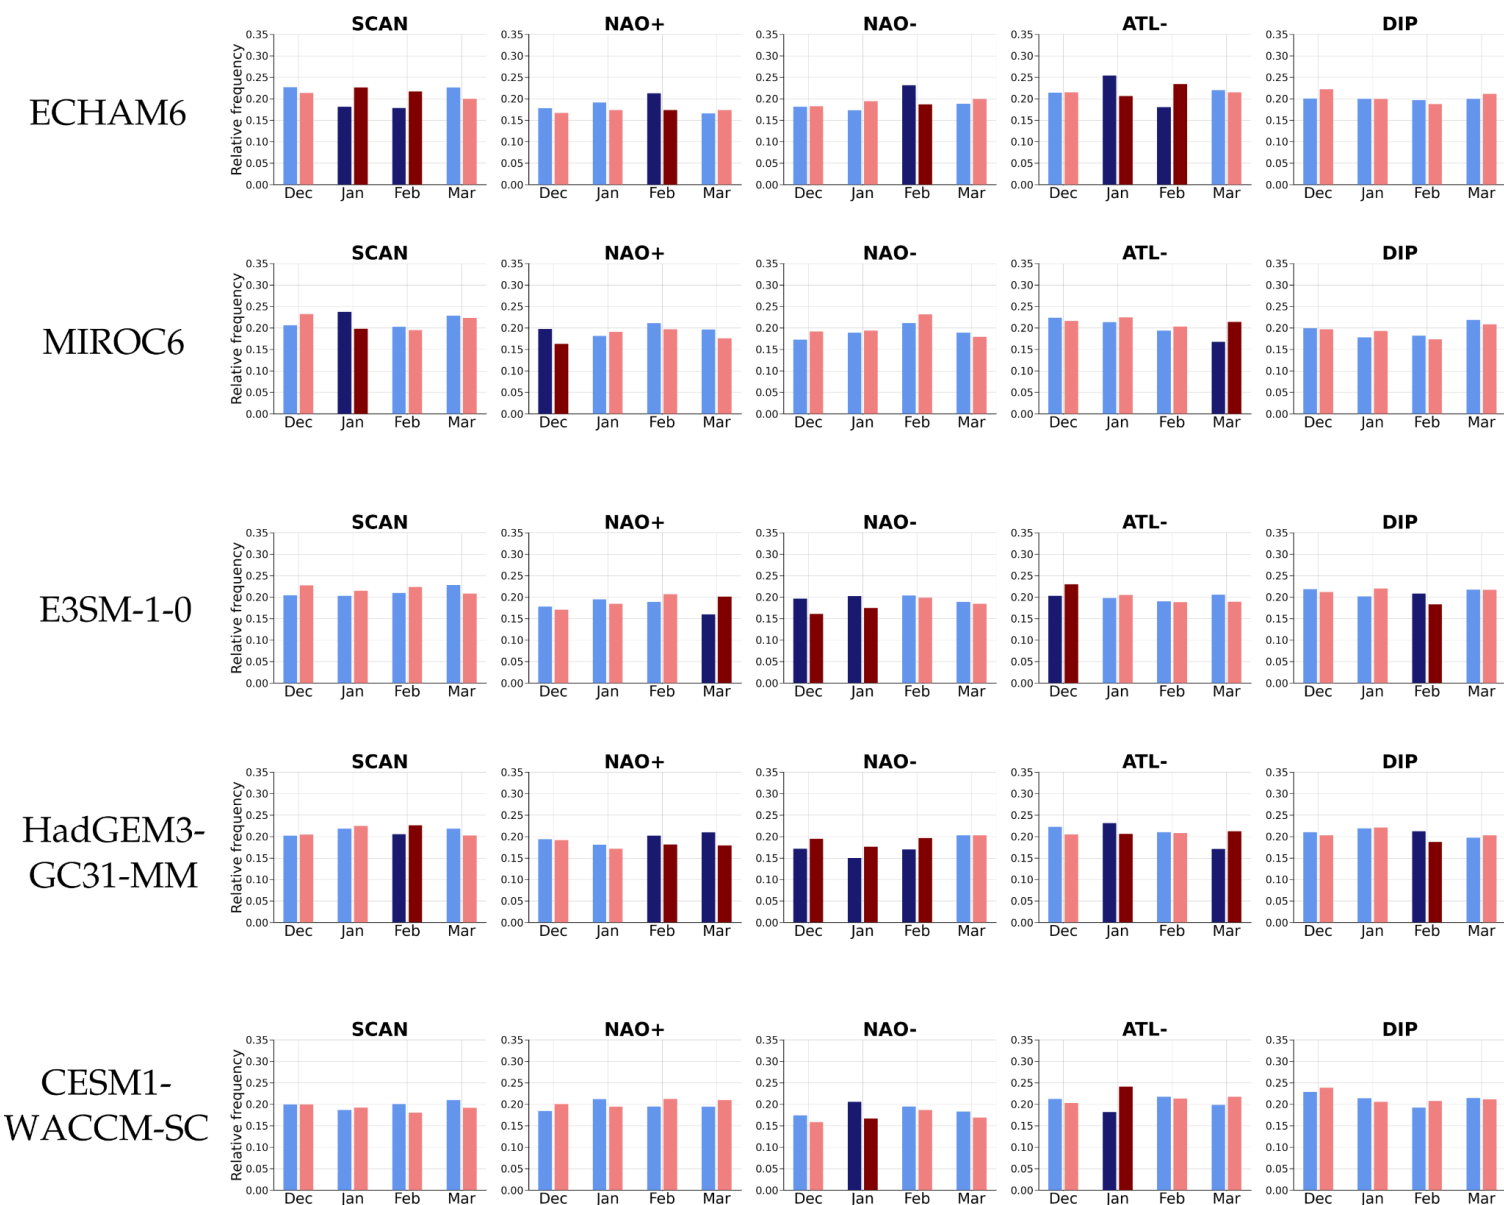

**Figure S3:** Relative regime occurrence frequencies for different winter months similar to Figs. 2f–j, but for different PAMIP models. Compared are the [pdSST/pdSIC](#) reference simulation (blueish bars) and the [futBKSIC](#) (redish bars). Only the five available models that according to Fig. S1 are able to realistically reproduce the regime pattern structure were considered here. Dark-colored bars indicate significant differences.

**Table S2:** Absolute number of regime days for each winter month that were used for the computation of the ERA5 regime frequencies in Fig. 2. Blue numbers indicate the number of regime days for **high** Arctic sea ice conditions, red numbers for **low** sea ice conditions.

|          | SCAN    | NAO+    | NAO-    | ATL-    | DIP     |
|----------|---------|---------|---------|---------|---------|
| December | 112/168 | 115/124 | 94/119  | 156/102 | 143/107 |
| January  | 81/181  | 151/100 | 94/110  | 163/100 | 131/129 |
| February | 100/183 | 142/82  | 94/94   | 96/119  | 128/82  |
| March    | 98/147  | 142/137 | 114/127 | 107/116 | 159/93. |

**Table S3:** Absolute number of regime days for each winter month that were used for the computation of the relative frequencies in Figs. 2a–e. Blue numbers indicate the day count for the (100 year-long) ECHAM6 **pdSST/pdSIC** experiment, red numbers for the (100 year-long) ECHAM6 **futArcSIC experiment**. Note, that the sum over all regimes for a specific month and an experiment sums up to 100 times the number of days within the respective month (e.g. 100\*31 days =3100 days for December).

|          | SCAN    | NAO+    | NAO-    | ATL-    | DIP     |
|----------|---------|---------|---------|---------|---------|
| December | 676/699 | 576/521 | 540/552 | 657/702 | 651/626 |
| January  | 585/682 | 610/569 | 522/596 | 770/611 | 613/642 |
| February | 534/572 | 536/594 | 682/455 | 484/660 | 564/519 |
| March    | 693/619 | 494/671 | 612/566 | 674/654 | 627/590 |

**Table S4:** Same as Table S3 but for **pdSST/pdSIC** and **futBKSIC**. Blue numbers indicate the day count for the (100 year-long) ECHAM6 **pdSST/pdSIC** experiment, red numbers indicate the counts for the (100 year-long) ECHAM6 **futBKSIC** experiment that were used for the computation of the relative frequencies in Figs. 2f–j .

|          | SCAN     | NAO+     | NAO-     | ATL-     | DIP      |
|----------|----------|----------|----------|----------|----------|
| December | 706/ 666 | 546/ 521 | 564/ 567 | 662/ 654 | 622/ 692 |
| January  | 567/ 703 | 585/ 537 | 534/ 605 | 792/ 634 | 622/ 621 |
| February | 498/ 612 | 598/ 482 | 646/ 524 | 505/ 652 | 553/ 530 |
| March    | 700/ 618 | 518/ 542 | 585/ 619 | 679/ 666 | 618/ 655 |

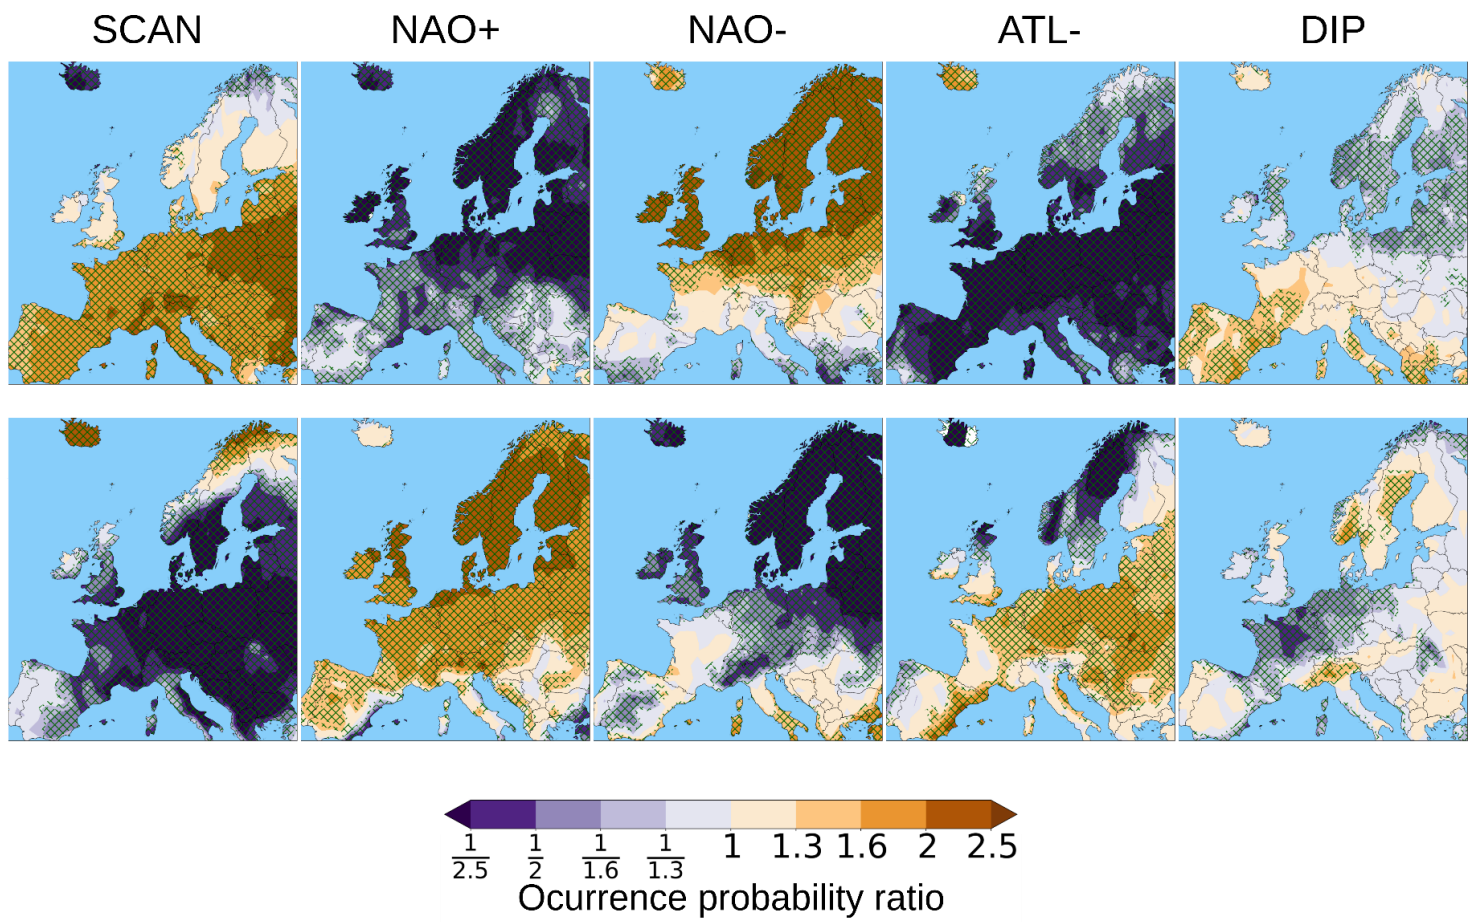

**Figure S4:** Same analysis as in Fig. 3, but for ERA5 over the period 1979–2018. Thus, regime patterns computed from ERA5 were used for computing these plots. ERA5 T2max/T2min times series at each grid point were linearly detrended beforehand.
